# Supplementary material for: Novel Zn0.8Cd0.2S@g-C3N4 core–shell heterojunctions with a twin structure for enhanced visible-light-driven photocatalytic hydrogen generation
Source: Royal Society of Chemistry journal article supplement (doi:10.1039/c8ta05927f), 2018-01-01
Supplement: c8ta05927f1.pdf [file c8ta05927f1.pdf]

## Supplementary Information

### Novel $\text{Zn}_{0.8}\text{Cd}_{0.2}\text{S}@g\text{-C}_3\text{N}_4$ core-shell heterojunctions with twin structure for enhanced visible-light-driven photocatalytic hydrogen generation

Feng-yu Tian, Dongfang Hou\*, Fan Tang, Min Deng, Xiu-qing Qiao, Qichun Zhang, Tao Wu and Dong-Sheng Li\*

*College of Materials and Chemical Engineering, Hubei Provincial Collaborative Innovation Center for New Energy Microgrid, Key laboratory of inorganic nonmetallic crystalline and energy conversion materials, China Three Gorges University, Yichang 443002, P. R. China*

\*Email - lidongsheng1@126.com

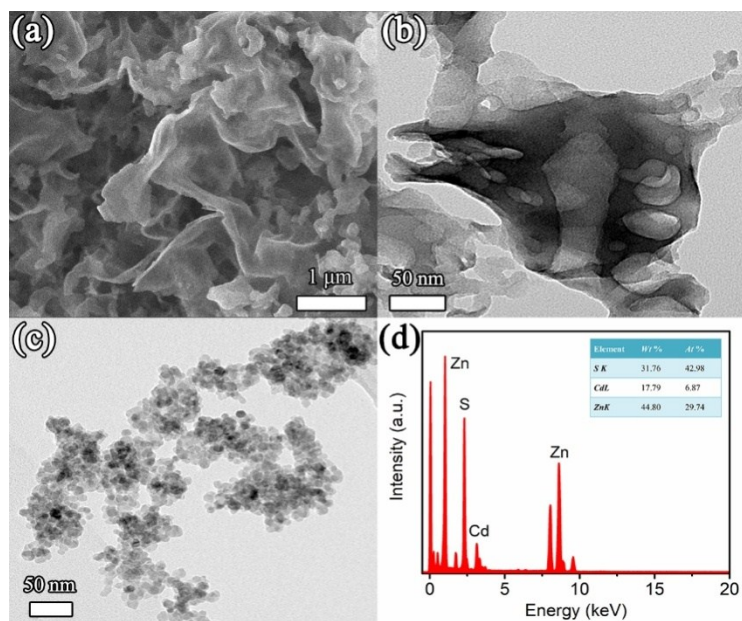

Fig. S1(a) SEM image of  $g\text{-C}_3\text{N}_4$ , TEM images of (b)  $g\text{-C}_3\text{N}_4$ , (c)  $\text{Zn}_{0.8}\text{Cd}_{0.2}\text{S}$ , (d) EDS spectrum of  $\text{Zn}_{0.8}\text{Cd}_{0.2}\text{S}$ .

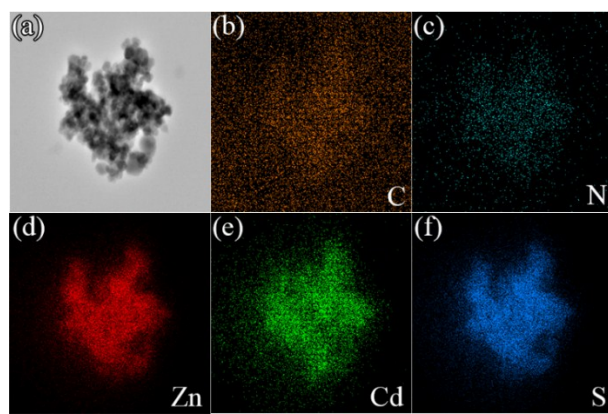

Fig. S2 EDX element mapping images of ZCCN10.
